# Supplementary material for: Balloon Angioplasty versus Implantation of Nitinol Stents in the Superficial Femoral Artery
Source: Atypon-hosted journal article supplement (doi:10.1056/nejmoa051303), 2006-05-03

## Supplementary Appendix

This appendix has been provided by the authors to give readers additional information about their work.

Supplement to: Schillinger M, Sabeti S, Loewe C, et al. Balloon angioplasty versus implantation of nitinol stents in the superficial femoral artery. *N Engl J Med* 2006;354:1879-88.

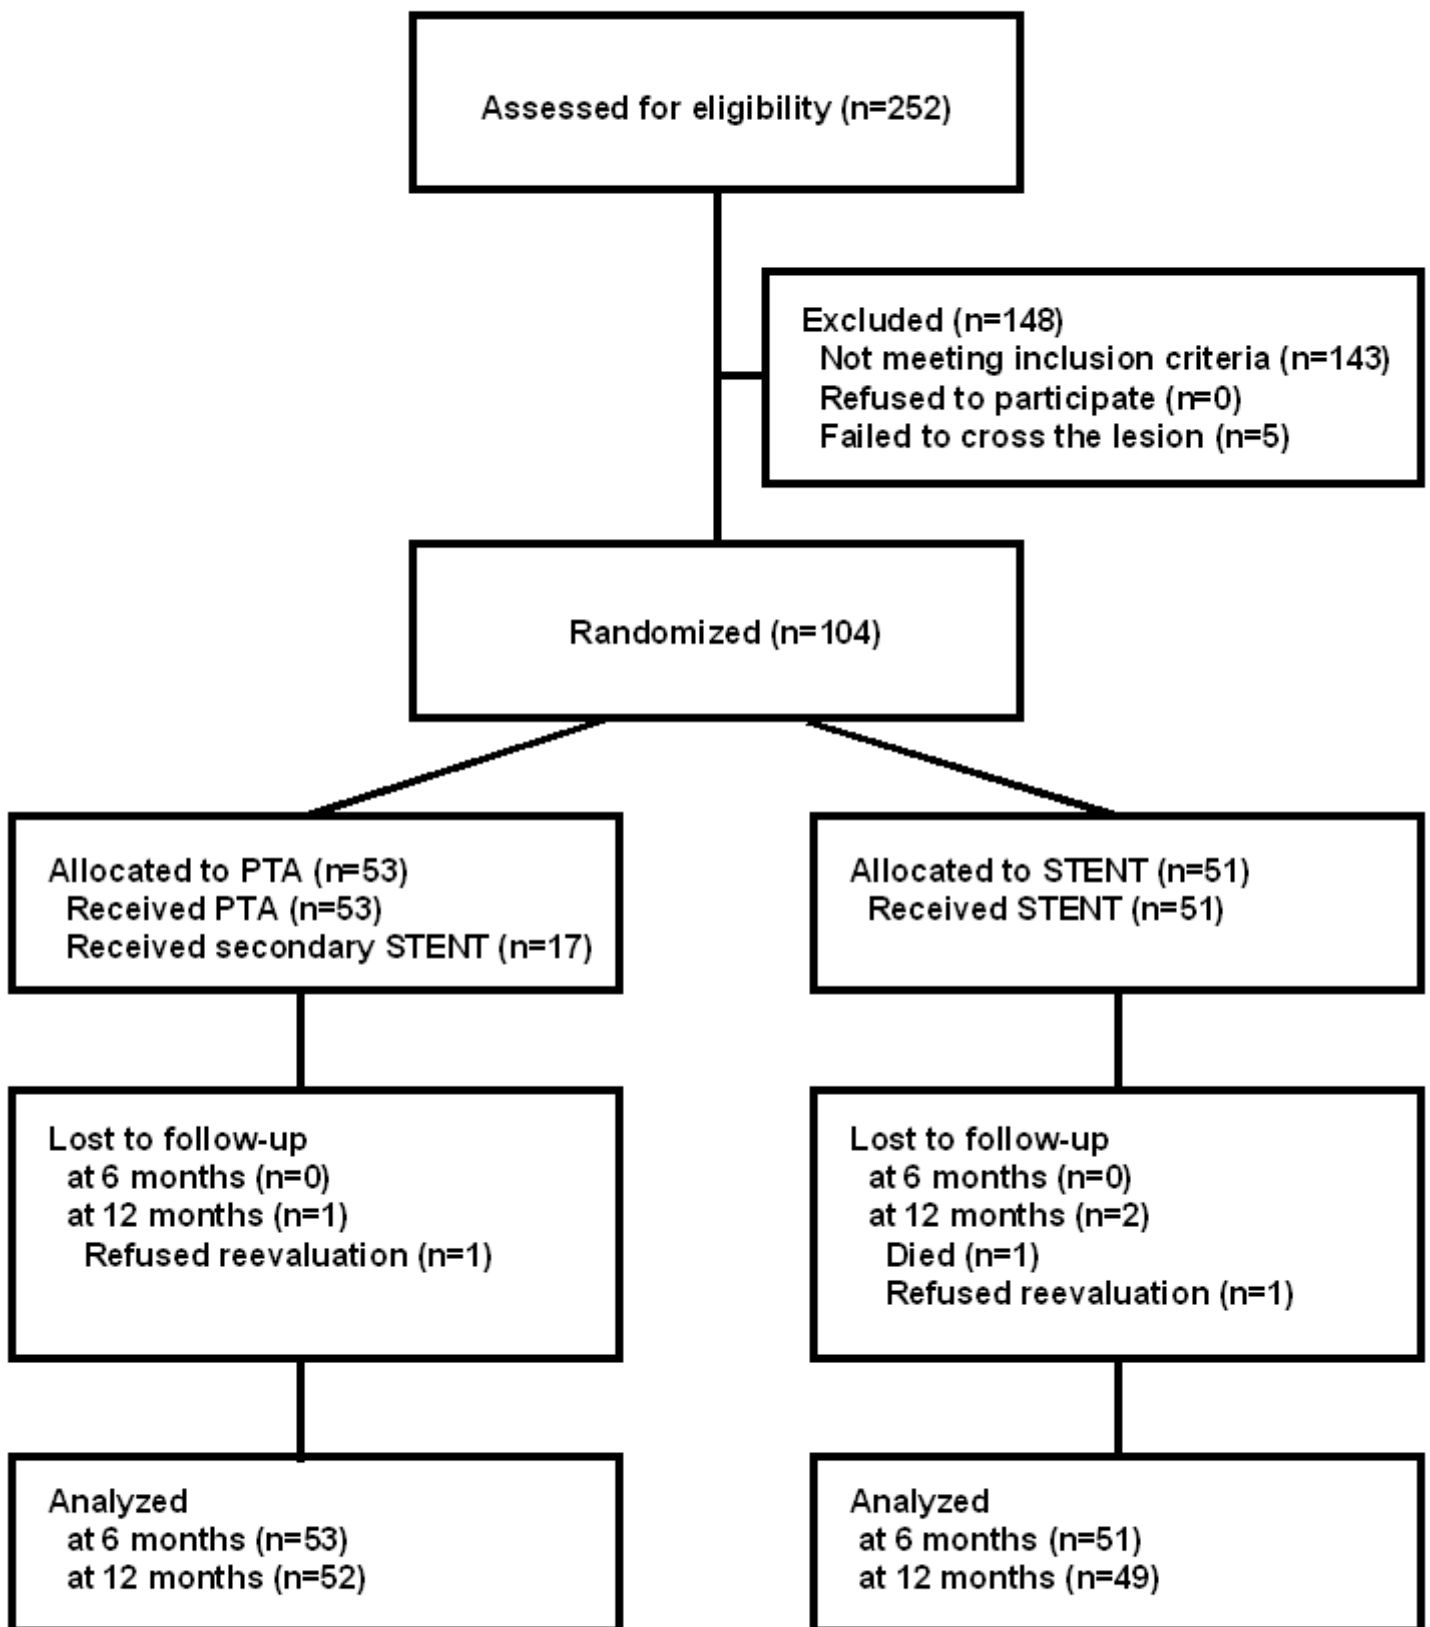

Supplement: nejm_schillinger_1879sa1.pdf [file nejm_schillinger_1879sa1.pdf]
